# Supplementary material
Source: publisher site journal article supplement (https://www.dovepress.com/get_supplementary_file.php?f=213525.xlsx)
Supplement: Supplementary file 1 [file get_supplementary_file.php]

## Sheet: Sheet1
Table S1 ANI values between C. freundii strains with published genome sequences
Strain name	Isolation source	Geographic location	Host/Host disease	GenBank Accession number	ANI value (%)
					HM38	UMH19	CRCB-101	AR_0022	CFNIH1	FDAARGOS_550	705SK3	CAV1741	UMH14	R17	FDAARGOS_61	SL151	UMH13	CAV1321	18_1	UMH16	AR_0116	FDAARGOS_549	UMH15	B38	FDAARGOS_73	NCTC9750
HM38	missing	USA	Homo sapiens/bacteremia	CP024672.1	100	98.58	92.92	98.72	90.95	98.89	98.95	98.99	98.95	98.93	92.85	98.93	98.7	99	98.91	98.99	99.02	98.92	98.89	98.87	98.7	98.95
UMH19	missing	USA	Homo sapiens/bacteremia	CP024673.1	98.58	100	92.92	98.96	91.01	98.49	98.51	98.56	98.54	98.51	92.92	98.49	98.93	98.6	98.46	98.53	98.55	98.53	98.36	98.47	98.88	98.59
CRCB-101	open pus	South Korea	Homo sapiens/not collected	CP024819.1	92.92	92.92	100	93.02	91.36	92.95	92.87	92.98	92.92	92.92	99.25	92.89	93.05	92.97	92.95	92.91	92.9	92.92	92.89	92.94	93.04	92.8
AR_0022	missing	missing	missing	CP024881.1	98.72	98.96	93.02	100	90.95	98.94	98.75	98.73	98.65	98.68	93	98.69	99.95	98.73	98.62	98.72	98.74	98.64	98.6	98.65	99.92	98.71
CFNIH1	sink aerator	USA	-	CP007557.1	90.95	91.01	91.36	90.95	100	91.05	91.02	91.03	90.94	90.99	91.31	91.05	90.95	91.03	91.05	91.02	91.01	90.97	91.06	91.05	90.95	90.88
FDAARGOS_550	clinical isolate	USA	Homo sapiens/unknown	CP033742.1	98.89	98.49	92.95	98.94	91.05	100	98.82	98.92	99.11	98.98	92.87	98.88	98.6	98.93	99.1	98.9	98.95	99.04	99.89	99.02	98.59	98.97
705SK3	wastewater	Switzerland	-	CP022151.1	98.95	98.51	92.87	98.75	91.02	98.82	100	98.87	98.91	98.89	92.88	98.88	98.72	98.88	98.86	98.87	98.9	98.82	98.81	98.78	98.68	98.95
CAV1741	Respiratory	USA	Homo sapiens/missing	CP011657.1	98.99	98.56	92.98	98.73	91.03	98.92	98.87	100	98.98	98.93	92.9	98.95	98.68	99.96	98.89	98.94	98.99	98.92	98.89	98.89	98.65	98.99
UMH14	missing	USA	Homo sapiens/bacteremia	CP024680.1	98.95	98.54	92.92	98.65	90.94	99.11	98.91	98.98	100	98.99	92.87	98.94	98.65	98.98	99.09	98.98	99	99.9	99.11	99.07	98.64	98.97
R17	WWTP	China	-	CP035276.1	98.93	98.51	92.92	98.68	90.99	98.98	98.89	98.93	98.99	100	92.88	98.88	98.67	98.94	98.93	98.94	99	98.97	98.91	98.97	98.64	98.98
FDAARGOS_61	Rectal Swab	USA	Homo sapiens/surveillance	CP026045.1	92.85	92.92	99.25	93	91.31	92.87	92.88	92.9	92.87	92.88	100	98.64	98.97	98.88	98.99	98.97	98.87	98.85	98.9	98.62	92.99	92.8
SL151	Human urine	Sierra Leone	Homo sapiens/urinary tract infection	CP016952.1	98.93	98.49	92.89	98.69	91.05	98.88	98.88	98.95	98.94	98.88	92.89	100	98.69	98.61	98.69	98.69	98.63	98.61	98.63	99.94	98.62	98.94
UMH13	missing	USA	Homo sapiens/bacteremia	CP024683.1	98.7	98.93	93.05	99.95	90.95	98.6	98.72	98.68	98.65	98.67	93	98.64	100	98.91	98.97	98.99	98.92	98.91	98.92	98.67	99.94	98.71
CAV1321	Urine/Genitourinary	USA	Homo sapiens/missing	CP011612.1	99	98.6	92.97	98.73	91.03	98.93	98.88	99.96	98.98	98.94	92.89	98.97	98.69	100	98.86	98.92	99.03	99.04	99.06	98.54	98.67	99
18_1	Sediment around river	China	-	CP022273.1	98.91	98.46	92.95	98.62	91.05	99.1	98.86	98.89	99.09	98.93	92.94	98.88	98.61	98.91	100	98.98	98.89	98.89	98.82	98.64	98.54	98.96
UMH16	missing	USA	Homo sapiens/bacteremia	CP024677.1	98.99	98.53	92.91	98.72	91.02	98.9	98.87	98.94	98.98	98.94	92.89	98.99	98.69	98.97	98.86	100	98.92	98.92	98.84	98.66	98.64	98.97
AR_0116	missing	missing	missing	CP032184.1	99.02	98.55	92.9	98.74	91.01	98.95	98.9	98.99	99	99	92.91	98.97	98.69	98.99	98.92	98.98	100	99.009	98.97	98.61	98.66	99.03
FDAARGOS_549	clinical isolate	USA	Homo sapiens/unknown	CP033744.1	98.92	98.53	92.92	98.64	90.97	99.04	98.82	98.92	99.9	98.97	92.87	98.87	98.63	98.92	99.03	98.89	98.92	100	99.03	98.6	98.61	98.96
UMH15	missing	USA	Homo sapiens/bacteremia	CP024679.1	98.89	98.36	92.89	98.6	91.06	99.89	98.81	98.89	99.11	98.91	92.82	98.85	98.61	98.91	99.04	98.89	98.92	99.009	100	98.62	98.6	98.97
B38	unknown	China	Homo sapiens/leg ulcer	CP016762.1	98.87	98.47	92.94	98.65	91.05	99.02	98.78	98.89	99.07	98.97	92.91	98.9	98.63	98.92	99.06	98.82	98.84	98.97	99.03	100	98.62	98.95
FDAARGOS_73	Lung Tissue grind	USA	Homo sapiens/respiratory distress	CP026056.1	98.7	98.88	93.04	99.92	90.95	98.59	98.68	98.65	98.64	98.64	92.99	98.62	99.94	98.67	98.54	98.64	98.66	98.61	98.6	98.62	100	98.69
NCTC9750	not available	not available	not available	LR134118.1	98.95	98.59	92.8	98.71	90.88	98.97	98.95	98.99	98.97	98.98	92.8	98.94	98.71	99	98.96	98.97	99.03	98.96	98.97	98.95	98.69	100
																								0.9094		1
